# Supplementary material for: Gene expression variation in geographically diverse populations of two North American songbird species
Source: Frontiers journal article supplement (doi:10.3389/fbirs.2024.1382657), 2024-04-08
Supplement: Data_Sheet_1.zip [file Data_Sheet_1.zip]

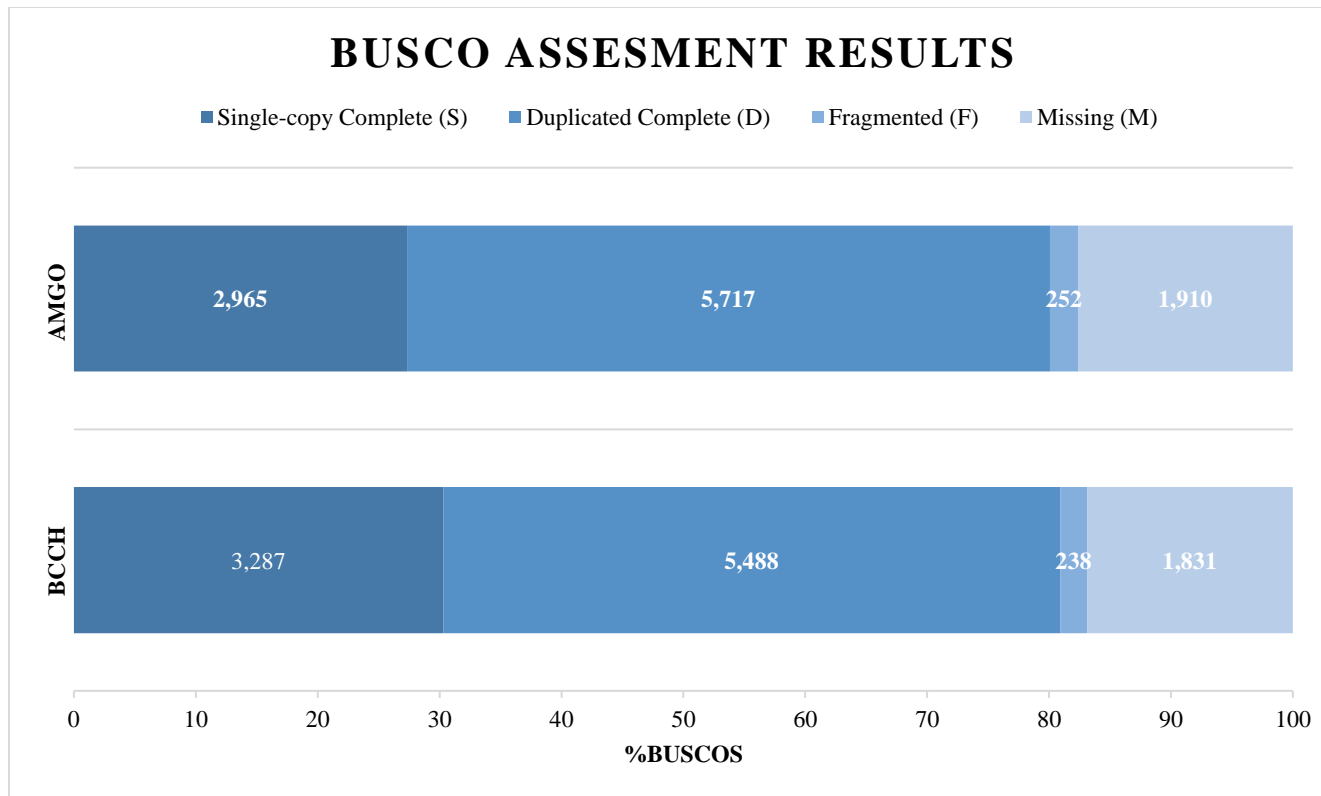

**Supplementary Figure 1.** Results from BUSCO assessment of 10,844 BUSCOs searched within the transcriptomes assembly of both species, AMGO – American GoldFinch, BCCH – Black capped Chickadees.

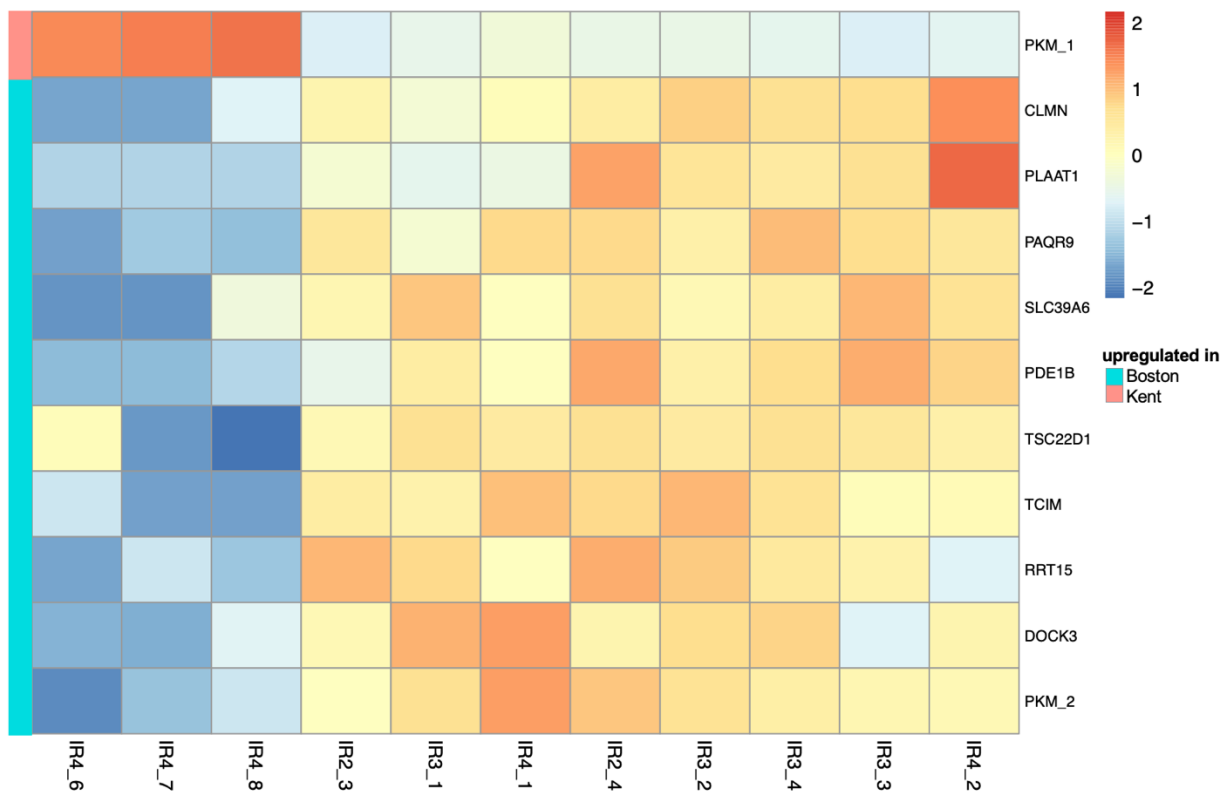

**Supplementary Figure 2.** A heatmap of the log of transcript per million of all 11 differentially expressed transcripts in American goldfinch brains between Kent and Boston, scaled by row.

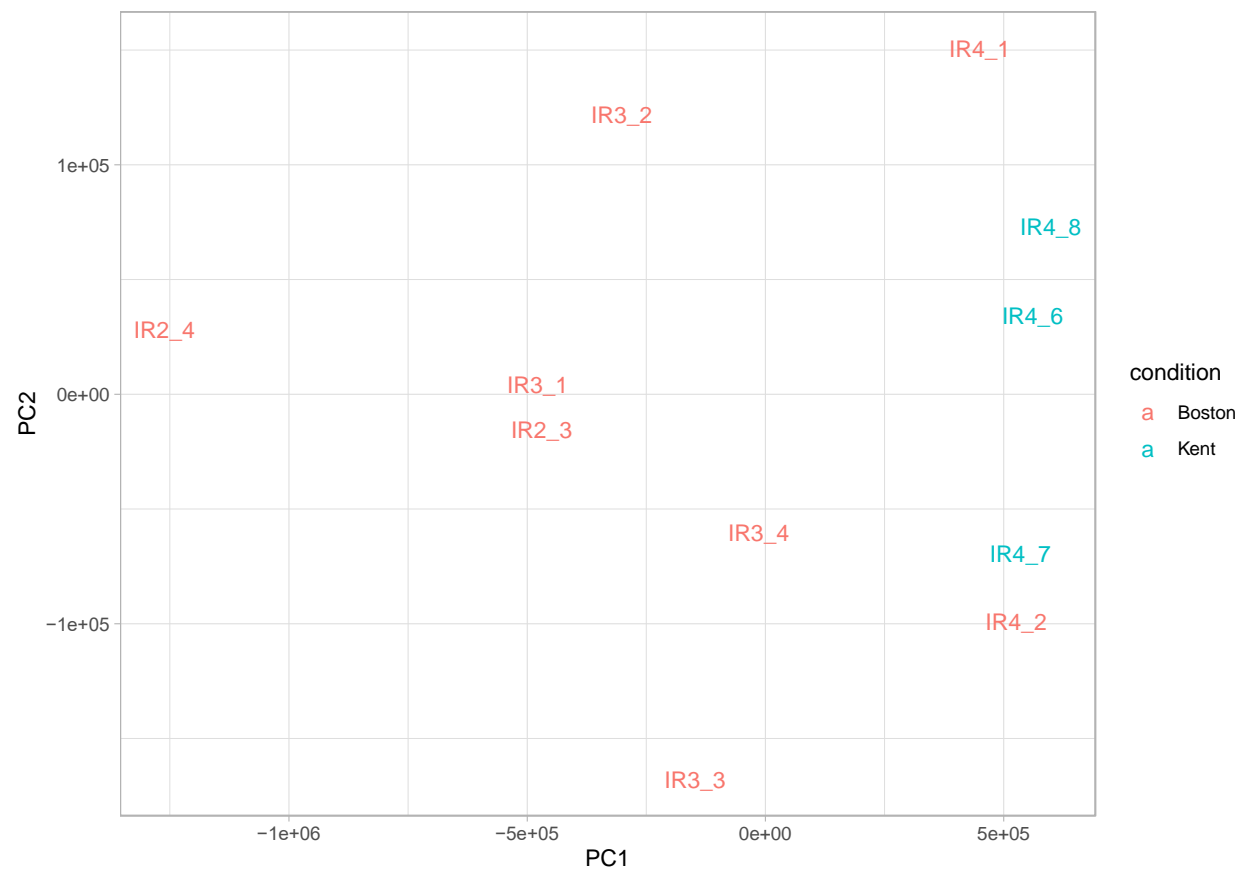

**Supplementary Figure 3.** Principal component analysis of the estimated transcript abundance of all American goldfinch brain samples. PC1 explains 95.33% of the variance, while PC2 explains 2.43% of the variance.

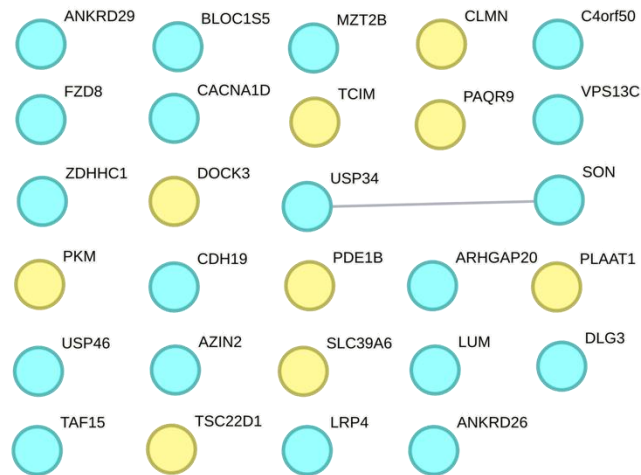

**Supplementary Figure 4.** The STRING network of protein-protein interactions between differentially expressed genes (yellow) and genes overlapping highly divergent genetic variants (blue) in American goldfinch brains between Boston and Kent populations.

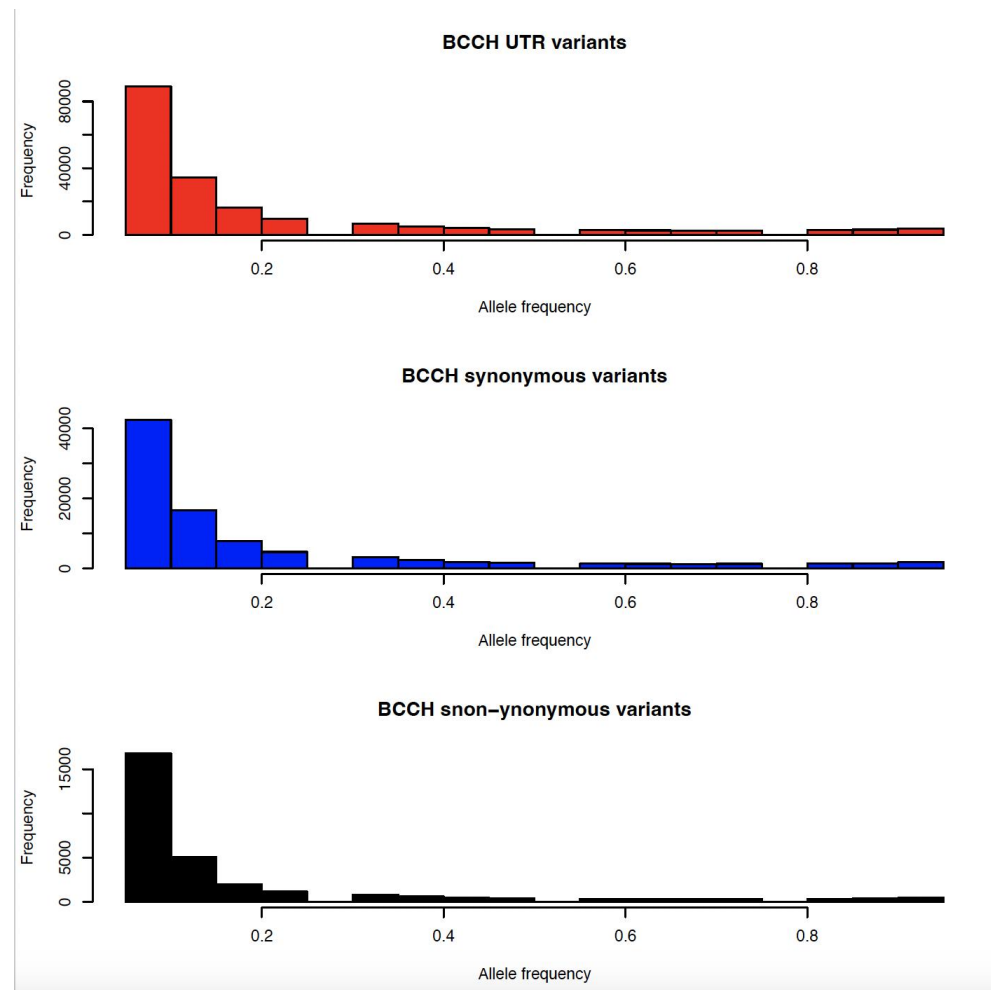

**Supplementary Figure 5.** Site frequency distribution of SNPs annotated as UTR, synonymous and non-synonymous in Black-capped chickadees.

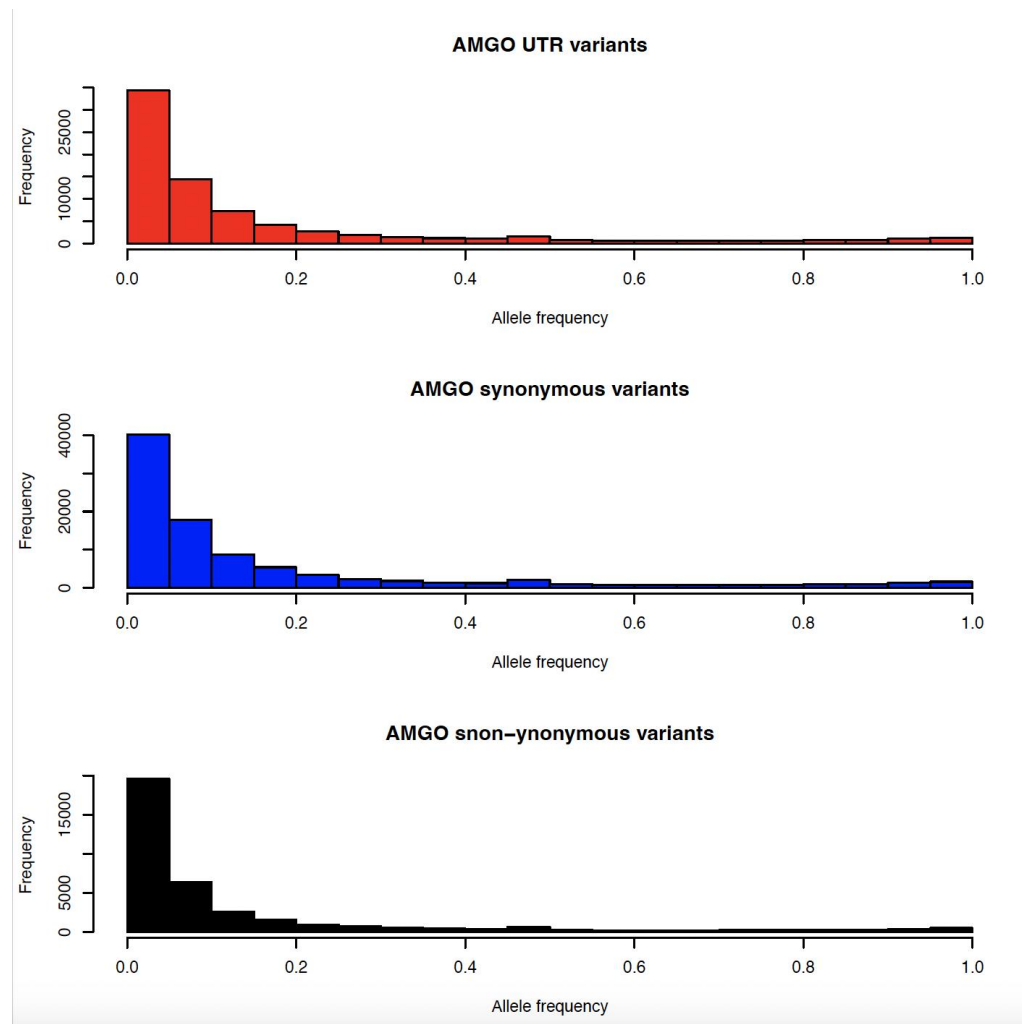

**Supplementary Figure 6.** Site frequency distribution of SNPs annotated as UTR, synonymous and non-synonymous in American goldfinches.

**Supplementary Table 1.** Details on RNA extraction, RNA quality, and raw RNA sequencing data generated.

| Sample ID | Reads ID | Species                     | Location | Tissue | Tissue weight (mg) | Concentration (ng/μl) | RIN | # Raw Sequencing Reads |
|-----------|----------|-----------------------------|----------|--------|--------------------|-----------------------|-----|------------------------|
| 18-055    | IR1_1    | <i>Poecile atricapillus</i> | Boston   | Brain  | 47.2               | 61.6                  | 9.5 | 53,431,462             |
| 18-056    | IR1_2    | <i>Poecile atricapillus</i> | Boston   | Brain  | 23.9               | >200                  | 9.7 | 49,814,234             |
| 18-059    | IR1_3    | <i>Poecile atricapillus</i> | Boston   | Brain  | 39.7               | 152                   | 9.5 | 44,614,814             |
| 18-073    | IR2_1    | <i>Poecile atricapillus</i> | Boston   | Brain  | 26.7               | 176                   | 9.6 | 42,035,660             |
| 18-074    | IR2_2    | <i>Poecile atricapillus</i> | Boston   | Brain  | 21.5               | 162                   | 9.6 | 39,774,700             |
| 18-047    | IR2_3    | <i>Spinus tristis</i>       | Boston   | Brain  | 31.9               | 196                   | 9.3 | 41,253,244             |
| 18-057    | IR2_4    | <i>Spinus tristis</i>       | Boston   | Brain  | 22.7               | 200                   | 9.2 | 47,072,134             |
| 18-058    | IR3_1    | <i>Spinus tristis</i>       | Boston   | Brain  | 28.8               | 28.4                  | 9.2 | 45,693,074             |
| 18-060    | IR3_2    | <i>Spinus tristis</i>       | Boston   | Brain  | 25.3               | >200                  | 9.4 | 48,687,494             |
| 18-072    | IR3_3    | <i>Spinus tristis</i>       | Boston   | Brain  | 30                 | >200                  | 9.2 | 45,322,088             |
| 18-075    | IR3_4    | <i>Spinus tristis</i>       | Boston   | Brain  | 26.6               | >200                  | 9.4 | 42,080,398             |
| 18-077    | IR4_1    | <i>Spinus tristis</i>       | Boston   | Brain  | 20.8               | 21.4                  | 9.5 | 50,252,768             |
| 18-078    | IR4_2    | <i>Spinus tristis</i>       | Boston   | Brain  | 28.7               | 43                    | 9   | 47,901,672             |
| TITR01    | IR4_3    | <i>Poecile atricapillus</i> | Kent     | Brain  | 28.2               | 59.4                  | 9.2 | 43,943,494             |
| TITR02    | IR4_4    | <i>Poecile atricapillus</i> | Kent     | Brain  | 25.8               | 150                   | 9.2 | 42,879,170             |
| TITR03    | IR4_5    | <i>Poecile atricapillus</i> | Kent     | Brain  | 27.9               | >200                  | 9.5 | 39,870,024             |
| TITR04    | IR4_6    | <i>Spinus tristis</i>       | Kent     | Brain  | 25.4               | >200                  | 9.4 | 49,794,216             |
| TITR05    | IR4_7    | <i>Spinus tristis</i>       | Kent     | Brain  | 24                 | 24.6                  | 9.4 | 44,225,076             |
| TITR06    | IR4_8    | <i>S. tristis</i>           | Kent     | Brain  | 27.2               | 73.6                  | 9.7 | 53,127,520             |
| TITR01    | IR5_1    | <i>Poecile atricapillus</i> | Kent     | Liver  | 20.8               | >200                  | 9.7 | 42,448,088             |
| TITR02    | IR5_2    | <i>Poecile atricapillus</i> | Kent     | Liver  | 23.5               | >200                  | 10  | 42,620,364             |
| TITR03    | IR5_3    | <i>Poecile atricapillus</i> | Kent     | Liver  | 27.8               | >200                  | 9.8 | 50,024,416             |

|               |       |                       |      |       |      |      |     |            |
|---------------|-------|-----------------------|------|-------|------|------|-----|------------|
| <b>TITR04</b> | IR5_4 | <i>Spinus tristis</i> | Kent | Liver | 21.1 | >200 | 9.7 | 40,349,998 |
| <b>TITR05</b> | IR5_5 | <i>Spinus tristis</i> | Kent | Liver | 25.8 | >200 | 9.7 | 50,106,532 |
| <b>TITR06</b> | IR5_6 | <i>Spinus tristis</i> | Kent | Liver | 29   | >200 | 9.7 | 50,195,350 |

**Supplementary Table 2.** The annotation of 96 DEGs between black-capped chickadee brains in Kent and Boston. The q-value is the FDR adjusted p-value, and the beta value is the biased estimate of natural log fold change between conditions.

| Transcript ID            | Gene Name | Annotation Method | q-value  | Beta   | Upregulated In |
|--------------------------|-----------|-------------------|----------|--------|----------------|
| TRINITY_DN126_c0_g1_i16  | PAK3      | Trinotate         | 2.39E-08 | 7.4928 | Kent           |
| TRINITY_DN1617_c0_g1_i3  | SCOC      | Trinotate         | 0.0385   | 6.6201 | Kent           |
| TRINITY_DN2080_c0_g1_i2  | TAB3      | Trinotate         | 0.0511   | 6.1287 | Kent           |
| TRINITY_DN3721_c0_g1_i3  | EIF4G2    | Trinotate         | 0.0881   | 6.1053 | Kent           |
| TRINITY_DN2461_c0_g1_i7  | TXNDC11   | Trinotate         | 0.0881   | 5.8864 | Kent           |
| TRINITY_DN3964_c0_g2_i2  | RERE      | Trinotate         | 0.0564   | 5.5942 | Kent           |
| TRINITY_DN4788_c1_g1_i16 | KALRN     | Trinotate         | 0.0063   | 5.4301 | Kent           |
| TRINITY_DN4794_c0_g1_i7  | NDUFV3    | Manual            | 0.0111   | 5.4247 | Kent           |
| TRINITY_DN3295_c0_g1_i6  | LANCL3    | Manual            | 0.0355   | 5.3633 | Kent           |
| TRINITY_DN64343_c0_g1_i1 | POLR2G    | Trinotate         | 0.0002   | 5.2883 | Kent           |
| TRINITY_DN298_c0_g1_i25  | UBASH3B   | Trinotate         | 0.0440   | 5.2668 | Kent           |
| TRINITY_DN62084_c0_g1_i7 | G2E3      | Trinotate         | 0.0222   | 5.1808 | Kent           |
| TRINITY_DN2042_c1_g1_i8  | INPP4A    | Trinotate         | 0.0762   | 5.1251 | Kent           |
| TRINITY_DN2345_c3_g1_i3  | AGFG2     | Trinotate         | 0.0714   | 4.8745 | Kent           |
| TRINITY_DN1486_c0_g3_i3  | FLNB      | Trinotate         | 0.0100   | 4.7558 | Kent           |
| TRINITY_DN3726_c1_g1_i7  | GBA2      | Trinotate         | 0.0906   | 4.6804 | Kent           |
| TRINITY_DN760_c0_g1_i9   | ABLIM2    | Trinotate         | 0.0082   | 4.6043 | Kent           |



|                          |            |           |          |        |      |
|--------------------------|------------|-----------|----------|--------|------|
| TRINITY_DN3516_c3_g1_i7  | TRPC5      | Trinotate | 0.0762   | 4.5913 | Kent |
| TRINITY_DN11246_c0_g1_i1 | CSGALNACT2 | Trinotate | 0.0260   | 4.5617 | Kent |
| TRINITY_DN21006_c0_g1_i2 | ID4        | Manual    | 0.0010   | 4.5299 | Kent |
| TRINITY_DN4112_c0_g1_i8  | CEP85L     | Trinotate | 0.0440   | 4.5077 | Kent |
| TRINITY_DN1760_c0_g1_i9  | HKDC1      | Trinotate | 0.0179   | 4.4620 | Kent |
| TRINITY_DN2722_c0_g1_i9  | MXRA7      | Manual    | 0.0386   | 4.3898 | Kent |
| TRINITY_DN4333_c0_g1_i35 | LAML3      | Trinotate | 0.0762   | 4.3186 | Kent |
| TRINITY_DN2315_c0_g1_i13 | TTC13      | Trinotate | 0.0260   | 4.1063 | Kent |
| TRINITY_DN3802_c0_g1_i13 | GPAA1      | Trinotate | 0.0758   | 4.0900 | Kent |
| TRINITY_DN2716_c1_g1_i2  | AHDC1      | Manual    | 0.0987   | 4.0607 | Kent |
| TRINITY_DN566_c0_g1_i1   | TPD52L2    | Trinotate | 0.0192   | 4.0606 | Kent |
| TRINITY_DN3078_c0_g1_i3  | TIMM29     | Trinotate | 0.0191   | 3.8557 | Kent |
| TRINITY_DN321_c0_g1_i17  | PNPO       | Trinotate | 0.0881   | 3.7583 | Kent |
| TRINITY_DN2047_c0_g1_i1  | UGCG_i1    | Trinotate | 0.0881   | 3.6511 | Kent |
| TRINITY_DN2751_c0_g3_i18 | Y0266      | Trinotate | 0.0828   | 3.4782 | Kent |
| TRINITY_DN1114_c2_g1_i5  | SOX14      | Trinotate | 0.0511   | 3.4336 | Kent |
| TRINITY_DN8264_c0_g1_i2  | IRX6       | Trinotate | 0.0945   | 3.2928 | Kent |
| TRINITY_DN34206_c0_g1_i1 | GATA3_i2   | Manual    | 0.0894   | 3.0755 | Kent |
| TRINITY_DN2250_c0_g1_i16 | PDZD3      | Trinotate | 0.0161   | 2.8445 | Kent |
| TRINITY_DN3447_c0_g1_i7  | LRRK1      | Trinotate | 0.0803   | 2.7167 | Kent |
| TRINITY_DN2741_c0_g2_i1  | LEF1       | Trinotate | 0.0906   | 2.6887 | Kent |
| TRINITY_DN2675_c0_g2_i1  | SP5        | Trinotate | 0.0707   | 2.1500 | Kent |
| TRINITY_DN1649_c1_g1_i1  | GATA3_i1   | Trinotate | 0.0234   | 1.9410 | Kent |
| TRINITY_DN7672_c0_g1_i1  | FXYP1      | Trinotate | 0.0355   | 1.8264 | Kent |
| TRINITY_DN113_c0_g1_i1   | PPDPFL_i1  | Trinotate | 0.0310   | 1.6502 | Kent |
| TRINITY_DN2170_c0_g2_i11 | IRX1       | Trinotate | 0.0987   | 1.6392 | Kent |
| TRINITY_DN11229_c0_g1_i1 | PPDPFL_i2  | Manual    | 1.76E-08 | 1.6364 | Kent |
| TRINITY_DN113_c0_g1_i2   | PPDPFL_i3  | Trinotate | 0.0431   | 1.5856 | Kent |
| TRINITY_DN3213_c0_g1_i12 | FGF13      | Trinotate | 0.0083   | 1.5210 | Kent |

|                           |          |           |          |         |        |
|---------------------------|----------|-----------|----------|---------|--------|
| TRINITY_DN597_c1_g2_i4    | MYORG    | Manual    | 0.0669   | 1.4730  | Kent   |
| TRINITY_DN398_c1_g1_i1    | OFD1     | Manual    | 0.0945   | 1.1840  | Kent   |
| TRINITY_DN17040_c0_g1_i4  | BTBD17   | Trinotate | 0.0082   | 1.1834  | Kent   |
| TRINITY_DN3588_c0_g1_i4   | RIPOR2   | Trinotate | 0.0511   | 1.1564  | Kent   |
| TRINITY_DN1191_c0_g1_i2   | GJB6     | Trinotate | 0.0222   | 1.0440  | Kent   |
| TRINITY_DN1946_c0_g1_i9   | PLPP4    | Trinotate | 0.0030   | 1.0241  | Kent   |
| TRINITY_DN200_c0_g1_i13   | ATP1A2   | Trinotate | 0.0021   | 0.8941  | Kent   |
| TRINITY_DN13996_c0_g1_i2  | CHCHD10  | Trinotate | 0.0931   | 0.8430  | Kent   |
| TRINITY_DN526_c4_g1_i26   | RPS6KA6  | Trinotate | 6.76E-09 | -6.2734 | Boston |
| TRINITY_DN340_c0_g1_i24   | VGf      | Trinotate | 0.0881   | -5.2737 | Boston |
| TRINITY_DN3162_c0_g2_i8   | FAM135A  | Trinotate | 0.0511   | -5.2112 | Boston |
| TRINITY_DN206_c3_g1_i1    | USP24    | Trinotate | 0.0004   | -5.1918 | Boston |
| TRINITY_DN208_c3_g1_i3    | INSR     | Manual    | 0.0005   | -4.8183 | Boston |
| TRINITY_DN4827_c0_g1_i8   | HLA-DRA  | Trinotate | 1.40E-06 | -4.7631 | Boston |
| TRINITY_DN3132_c4_g1_i8   | CCND3    | Trinotate | 0.0511   | -4.5287 | Boston |
| TRINITY_DN4129_c0_g1_i9   | PTPN4    | Trinotate | 0.0511   | -4.3272 | Boston |
| TRINITY_DN4536_c1_g1_i6   | FBXO4    | Trinotate | 0.0021   | -4.2774 | Boston |
| TRINITY_DN917_c1_g1_i2    | IQGAP1   | Trinotate | 0.0030   | -4.2351 | Boston |
| TRINITY_DN2924_c0_g1_i10  | SACS     | Trinotate | 0.0881   | -4.0801 | Boston |
| TRINITY_DN17256_c0_g1_i27 | ADCY3    | Manual    | 0.0657   | -4.0456 | Boston |
| TRINITY_DN7666_c0_g1_i9   | DENND6A  | Manual    | 0.0803   | -4.0005 | Boston |
| TRINITY_DN3658_c0_g1_i2   | NUMB     | Trinotate | 0.0540   | -3.8167 | Boston |
| TRINITY_DN337_c19_g1_i9   | AAK1     | Manual    | 0.0881   | -3.7290 | Boston |
| TRINITY_DN2820_c0_g1_i16  | BCKDHA   | Manual    | 0.0077   | -3.6940 | Boston |
| TRINITY_DN18651_c0_g1_i1  | NRN1     | Trinotate | 0.0987   | -3.0896 | Boston |
| TRINITY_DN2047_c1_g1_i8   | NLRC3_i1 | Trinotate | 0.0511   | -3.0567 | Boston |
| TRINITY_DN6401_c1_g1_i1   | NEMF     | Manual    | 7.49E-07 | -2.5076 | Boston |
| TRINITY_DN2047_c1_g1_i3   | NLRC3_i2 | Trinotate | 7.06E-06 | -2.4915 | Boston |
| TRINITY_DN2047_c0_g1_i6   | UGCG_i2  | Trinotate | 5.37E-07 | -2.2038 | Boston |

|                          |          |           |          |         |        |
|--------------------------|----------|-----------|----------|---------|--------|
| TRINITY_DN270_c0_g1_i13  | NACA_i1  | Trinotate | 7.39E-05 | -2.1385 | Boston |
| TRINITY_DN2047_c0_g1_i8  | UGCG_i3  | Trinotate | 6.76E-09 | -2.1121 | Boston |
| TRINITY_DN3144_c0_g1_i3  | BHLHE22  | Trinotate | 0.0511   | -2.0792 | Boston |
| TRINITY_DN2047_c0_g1_i10 | RRT15_i1 | Trinotate | 1.41E-08 | -2.0757 | Boston |
| TRINITY_DN2047_c0_g1_i3  | RRT15_i2 | Trinotate | 1.41E-08 | -2.0757 | Boston |
| TRINITY_DN393_c0_g1_i3   | CLMN     | Trinotate | 5.37E-07 | -1.8407 | Boston |
| TRINITY_DN2964_c0_g1_i1  | PLXNA2   | Trinotate | 0.0355   | -1.6893 | Boston |
| TRINITY_DN175_c9_g1_i16  | RASAL2   | Trinotate | 0.0919   | -1.6749 | Boston |
| TRINITY_DN3788_c0_g1_i6  | ANKRD11  | Trinotate | 0.0431   | -1.3583 | Boston |
| TRINITY_DN566_c1_g1_i7   | IGSF9B   | Trinotate | 0.0079   | -1.3333 | Boston |
| TRINITY_DN270_c0_g1_i9   | NACA_i2  | Trinotate | 0.0762   | -1.2659 | Boston |
| TRINITY_DN1650_c0_g1_i10 | FBXO34   | Trinotate | 0.0657   | -1.2314 | Boston |
| TRINITY_DN1256_c1_g1_i25 | ATP9A    | Trinotate | 0.0008   | -1.0562 | Boston |
| TRINITY_DN4727_c0_g1_i2  | DGKH     | Manual    | 0.0954   | -1.0544 | Boston |
| TRINITY_DN18_c25_g1_i25  | HPCAL1   | Trinotate | 0.0564   | -1.0378 | Boston |
| TRINITY_DN4340_c0_g1_i6  | FOSL2    | Trinotate | 0.0881   | -1.0252 | Boston |
| TRINITY_DN16425_c2_g1_i3 | GAP43    | Trinotate | 0.0125   | -0.9396 | Boston |
| TRINITY_DN906_c0_g1_i5   | SEZ6L    | Trinotate | 0.0127   | -0.8600 | Boston |
| TRINITY_DN1870_c3_g1_i8  | MAPKBP1  | Trinotate | 0.0881   | -0.8478 | Boston |
| TRINITY_DN1297_c0_g1_i4  | PLCL2    | Trinotate | 0.0868   | -0.7206 | Boston |
| TRINITY_DN97203_c1_g1_i1 | NPTXR    | Trinotate | 0.0987   | -0.6876 | Boston |

**Supplementary Table 3.** The annotation of 11 DEGs between American goldfinch brains in Kent and Boston. The q-value is the FDR adjusted p-value and the beta value is the biased estimate of natural log fold change between conditions.

| Trinity ID               | Gene Name | Annotation Method | q-value  | Beta    | Upregulated In |
|--------------------------|-----------|-------------------|----------|---------|----------------|
| TRINITY_DN583_c0_g1_i11  | PKM_i1    | Trinotate         | 5.30E-06 | 6.9190  | Kent           |
| TRINITY_DN2053_c0_g2_i3  | PLAAT1    | Trinotate         | 0.0001   | -5.0913 | Boston         |
| TRINITY_DN1193_c0_g1_i11 | CLMN      | Manual            | 0.0101   | -5.0639 | Boston         |
| TRINITY_DN4366_c0_g1_i5  | SLC39A6   | Trinotate         | 0.0595   | -4.9208 | Boston         |
| TRINITY_DN386_c1_g1_i25  | DOCK3     | Trinotate         | 0.0233   | -4.8288 | Boston         |
| TRINITY_DN5017_c0_g1_i22 | PDE1B     | Trinotate         | 0.0004   | -4.4257 | Boston         |
| TRINITY_DN2478_c0_g1_i10 | TCIM      | Trinotate         | 6.85E-05 | -3.5810 | Boston         |
| TRINITY_DN359_c1_g2_i2   | RRT15     | Trinotate         | 0.0116   | -3.2351 | Boston         |
| TRINITY_DN1158_c1_g1_i7  | PAQR9     | Trinotate         | 2.06E-12 | -1.9767 | Boston         |
| TRINITY_DN13656_c1_g1_i7 | TSC22D1   | Trinotate         | 0.0199   | -0.8557 | Boston         |
| TRINITY_DN583_c0_g1_i8   | PKM_i2    | Trinotate         | 0.0199   | -0.7211 | Boston         |

**Supplementary Table 4:** Annotation based on PANTHER database matches for DEGs between black-capped chickadee brains in Kent and Boston.

| Gene ID        | PANTHER Family/Subfamily                                    | PANTHER Protein Class                        |
|----------------|-------------------------------------------------------------|----------------------------------------------|
| <b>AAK1</b>    | PROTEIN KINASE DOMAIN-CONTAINING PROTEIN                    | non-receptor serine/threonine protein kinase |
| <b>ABLIM2</b>  | ACTIN-BINDING LIM PROTEIN 2                                 | actin or actin-binding cytoskeletal protein  |
| <b>ADCY3</b>   | ADENYLATE CYCLASE TYPE 3                                    | adenylate cyclase                            |
| <b>AGFG2</b>   | ARF-GAP DOMAIN AND FG REPEAT-CONTAINING PROTEIN 2           |                                              |
| <b>AHDC1</b>   | AT-HOOK DNA-BINDING MOTIF-CONTAINING PROTEIN 1              |                                              |
| <b>ANKRD11</b> | ANKYRIN REPEAT DOMAIN-CONTAINING PROTEIN 11                 |                                              |
| <b>ATP1A2</b>  | SODIUM_POTASSIUM-TRANSPORTING ATPASE SUBUNIT ALPHA-2        | primary active transporter                   |
| <b>ATP9A</b>   | PHOSPHOLIPID-TRANSPORTING ATPASE IIA-RELATED                | primary active transporter                   |
| <b>BCKDHA</b>  | 2-OXOISOVALERATE DEHYDROGENASE SUBUNIT ALPHA, MITOCHONDRIAL | dehydrogenase                                |

|                   |                                                                                 |                                             |
|-------------------|---------------------------------------------------------------------------------|---------------------------------------------|
| <b>BHLHE22</b>    | CLASS E BASIC HELIX-LOOP-HELIX PROTEIN 22                                       | basic helix-loop-helix transcription factor |
| <b>BTBD17</b>     | BTB_POZ DOMAIN-CONTAINING PROTEIN 17                                            | defense/immunity protein                    |
| <b>CCND3</b>      | G1_S-SPECIFIC CYCLIN-D3                                                         | kinase activator                            |
| <b>CEP85L</b>     | CENTROSOMAL PROTEIN OF 85 KDA-LIKE                                              |                                             |
| <b>CHCHD10</b>    | COILED-COIL-HELIX-COILED-COIL-HELIX DOMAIN-CONTAINING PROTEIN 10, MITOCHONDRIAL |                                             |
| <b>CLMN</b>       | CALMIN                                                                          |                                             |
| <b>CSGALNACT2</b> | CHONDROITIN SULFATE N-ACETYL GALACTOSAMINYLTRANSFERASE 2                        | glycosyltransferase                         |
| <b>DENND6A</b>    | PROTEIN DENND6A                                                                 |                                             |
| <b>DGKH</b>       | DIACYLGLYCEROL KINASE ETA                                                       | kinase                                      |
| <b>EIF4G2</b>     | EUKARYOTIC TRANSLATION INITIATION FACTOR 4 GAMMA 2                              | translation initiation factor               |
| <b>FAM135A</b>    | PROTEIN FAM135A                                                                 |                                             |
| <b>FBXO34</b>     | F-BOX ONLY PROTEIN 34                                                           |                                             |
| <b>FBXO4</b>      | F-BOX ONLY PROTEIN 4                                                            |                                             |
| <b>FGF13</b>      | FIBROBLAST GROWTH FACTOR 13                                                     | growth factor                               |
| <b>FLNB</b>       | FILAMIN-B                                                                       |                                             |
| <b>FOSL2</b>      | FOS-RELATED ANTIGEN 2                                                           | basic leucine zipper transcription factor   |
| <b>FXYP1</b>      | PHOSPHOLEMMAN                                                                   | primary active transporter                  |
| <b>G2E3</b>       | G2_M PHASE-SPECIFIC E3 UBIQUITIN-PROTEIN LIGASE                                 | DNA metabolism protein                      |
| <b>GAP43</b>      | NEUROMODULIN                                                                    |                                             |
| <b>GATA3</b>      | TRANS-ACTING T-CELL-SPECIFIC TRANSCRIPTION FACTOR GATA-3                        | DNA-binding transcription factor            |
| <b>GBA2</b>       | NON-LYSOSOMAL GLUCOSYLCERAMIDASE                                                | glucosidase                                 |
| <b>GJB6</b>       | GAP JUNCTION BETA-6 PROTEIN                                                     | gap junction                                |

|                |                                                                            |                                                   |
|----------------|----------------------------------------------------------------------------|---------------------------------------------------|
| <b>GPAA1</b>   | GLYCOSYLPHOSPHATIDYLINOSITOL ANCHOR ATTACHMENT 1 PROTEIN                   |                                                   |
| <b>HKDC1</b>   | HEXOKINASE HKDC1                                                           | kinase                                            |
| <b>HLA-DRA</b> | HLA CLASS II HISTOCOMPATIBILITY ANTIGEN, DR ALPHA CHAIN                    | major histocompatibility complex protein          |
| <b>HPCAL1</b>  | HIPPOCALCIN-LIKE PROTEIN 1                                                 | calmodulin-related                                |
| <b>ID4</b>     | DNA-BINDING PROTEIN INHIBITOR ID-4                                         | DNA-binding transcription factor                  |
| <b>IGSF9B</b>  | PROTEIN TURTLE HOMOLOG B                                                   | immunoglobulin superfamily cell adhesion molecule |
| <b>INPP4A</b>  | INOSITOL POLYPHOSPHATE-4-PHOSPHATASE TYPE I A                              | phosphatase                                       |
| <b>INSR</b>    | INSULIN RECEPTOR                                                           | transmembrane signal receptor                     |
| <b>IQGAP1</b>  | RAS GTPASE-ACTIVATING-LIKE PROTEIN IQGAP1                                  | GTPase-activating protein                         |
| <b>IRX1</b>    | IROQUOIS-CLASS HOMEODOMAIN PROTEIN IRX-1                                   | homeodomain transcription factor                  |
| <b>IRX6</b>    | IROQUOIS-CLASS HOMEODOMAIN PROTEIN IRX-6                                   | homeodomain transcription factor                  |
| <b>KALRN</b>   | KALIRIN                                                                    | guanyl-nucleotide exchange factor                 |
| <b>LANCL3</b>  | LANC-LIKE PROTEIN 3                                                        |                                                   |
| <b>LEF1</b>    | LYMPHOID ENHANCER-BINDING FACTOR 1                                         | DNA-binding transcription factor                  |
| <b>LRRK1</b>   | LEUCINE-RICH REPEAT SERINE_THREONINE-PROTEIN KINASE 1                      | transmembrane signal receptor                     |
| <b>MAPKBP1</b> | MITOGEN-ACTIVATED PROTEIN KINASE-BINDING PROTEIN 1                         |                                                   |
| <b>MXRA7</b>   | MATRIX-REMODELING-ASSOCIATED PROTEIN 7                                     |                                                   |
| <b>MYORG</b>   | MYOGENESIS-REGULATING GLYCOSIDASE                                          | glucosidase                                       |
| <b>NACA</b>    | NASCENT POLYPEPTIDE-ASSOCIATED COMPLEX SUBUNIT ALPHA, MUSCLE-SPECIFIC FORM | basic helix-loop-helix transcription factor       |
| <b>NDUFV3</b>  | NADH DEHYDROGENASE [UBIQUINONE] FLAVOPROTEIN 3, MITOCHONDRIAL              | oxidoreductase                                    |

|                |                                                                                        |                                                 |
|----------------|----------------------------------------------------------------------------------------|-------------------------------------------------|
| <b>NEMF</b>    | RIBOSOME QUALITY CONTROL COMPLEX<br>SUBUNIT NEMF                                       |                                                 |
| <b>NLRC3</b>   | NLR FAMILY CARD DOMAIN-CONTAINING<br>PROTEIN 3                                         | scaffold/adaptor protein                        |
| <b>NPTXR</b>   | NEURONAL PENTRAXIN RECEPTOR                                                            | scaffold/adaptor protein                        |
| <b>NRN1</b>    | NEURITIN                                                                               |                                                 |
| <b>NUMB</b>    | PROTEIN NUMB HOMOLOG                                                                   |                                                 |
| <b>OFD1</b>    | ORAL-FACIAL-DIGITAL SYNDROME 1<br>PROTEIN                                              |                                                 |
| <b>PAK3</b>    | SERINE_THREONINE-PROTEIN KINASE PAK 3                                                  | non-receptor serine/threonine<br>protein kinase |
| <b>PDZD3</b>   | NA(+) H(+) EXCHANGE REGULATORY<br>COFACTOR NHE-RF4 (PTHR14191:SF20)                    | scaffold/adaptor protein                        |
| <b>PLCL2</b>   | INACTIVE PHOSPHOLIPASE C-LIKE PROTEIN 2                                                | phospholipase                                   |
| <b>PLPP4</b>   | PHOSPHOLIPID PHOSPHATASE 4                                                             | phosphatase                                     |
| <b>PLXNA2</b>  | PLEXIN-A2                                                                              | transmembrane signal receptor                   |
| <b>PNPO</b>    | PYRIDOXINE-5'-PHOSPHATE OXIDASE                                                        | oxidase                                         |
| <b>POLR2G</b>  | DNA-DIRECTED RNA POLYMERASE II<br>SUBUNIT RPB7                                         | DNA-directed RNA polymerase                     |
| <b>PPDPFL</b>  | PANCREATIC PROGENITOR CELL<br>DIFFERENTIATION AND PROLIFERATION<br>FACTOR-LIKE PROTEIN |                                                 |
| <b>PTPN4</b>   | TYROSINE-PROTEIN PHOSPHATASE NON-<br>RECEPTOR TYPE 4                                   | protein phosphatase                             |
| <b>RASAL2</b>  | RAS GTPASE-ACTIVATING PROTEIN NGAP                                                     | GTPase-activating protein                       |
| <b>RERE</b>    | ARGININE-GLUTAMIC ACID DIPEPTIDE<br>REPEATS PROTEIN                                    |                                                 |
| <b>RIPOR2</b>  | RHO FAMILY-INTERACTING CELL<br>POLARIZATION REGULATOR 2                                | non-receptor serine/threonine<br>protein kinase |
| <b>RPS6KA6</b> | RIBOSOMAL PROTEIN S6 KINASE ALPHA-6                                                    | protein modifying enzyme                        |
| <b>SACS</b>    | SACSIN                                                                                 |                                                 |
| <b>SCOC</b>    | SHORT COILED-COIL PROTEIN                                                              |                                                 |



|                |                                                               |                                       |
|----------------|---------------------------------------------------------------|---------------------------------------|
| <b>SEZ6L</b>   | SEIZURE 6-LIKE PROTEIN                                        |                                       |
| <b>SOX14</b>   | TRANSCRIPTION FACTOR SOX-14                                   | HMG box transcription factor          |
| <b>SP5</b>     | TRANSCRIPTION FACTOR SP5                                      | C2H2 zinc finger transcription factor |
| <b>TAB3</b>    | TGF-BETA-ACTIVATED KINASE 1 AND MAP3K7-BINDING PROTEIN 3      |                                       |
| <b>TIMM29</b>  | MITOCHONDRIAL IMPORT INNER MEMBRANE TRANSLOCASE SUBUNIT TIM29 |                                       |
| <b>TPD52L2</b> | TUMOR PROTEIN D54                                             |                                       |
| <b>TRPC5</b>   | SHORT TRANSIENT RECEPTOR POTENTIAL CHANNEL 5                  | ion channel                           |
| <b>TTC13</b>   | TETRATRICOPEPTIDE REPEAT PROTEIN 13                           |                                       |
| <b>TXNDC11</b> | THIOREDOXIN DOMAIN-CONTAINING PROTEIN 11                      | oxidoreductase                        |
| <b>UBASH3B</b> | UBIQUITIN-ASSOCIATED AND SH3 DOMAIN-CONTAINING PROTEIN B      |                                       |
| <b>UGCG</b>    | CERAMIDE GLUCOSYLTRANSFERASE                                  | glycosyltransferase                   |
| <b>USP24</b>   | UBIQUITIN CARBOXYL-TERMINAL HYDROLASE 24                      | cysteine protease                     |
| <b>VGF</b>     | NEUROSECRETORY PROTEIN VGF                                    | intercellular signal molecule         |

**Supplementary Table 5.** Annotation based on PANTHER database matches for DEGs between American goldfinch brains in Kent and Boston.

| Gene ID        | PANTHER Family/Subfamily                                                                   | Panther Protein Class             |
|----------------|--------------------------------------------------------------------------------------------|-----------------------------------|
| <b>PKM</b>     | PYRUVATE KINASE PKM                                                                        | kinase                            |
| <b>TSC22D1</b> | TSC22 DOMAIN FAMILY PROTEIN 1                                                              |                                   |
| <b>CLMN</b>    | CALMIN                                                                                     |                                   |
| <b>PLAAT1</b>  | PHOSPHOLIPASE A AND ACYLTRANSFERASE 1                                                      | acyltransferase                   |
| <b>DOCK3</b>   | DEDICATOR OF CYTOKINESIS PROTEIN 3                                                         | guanyl-nucleotide exchange factor |
| <b>PDE1B</b>   | DUAL SPECIFICITY CALCIUM_CALMODULIN-DEPENDENT 3',5'-CYCLIC NUCLEOTIDE PHOSPHODIESTERASE 1B | phosphodiesterase                 |
| <b>PAQR9</b>   | MEMBRANE PROGESTIN RECEPTOR EPSILON                                                        | G-protein coupled receptor        |
| <b>SLC39A6</b> | ZINC TRANSPORTER ZIP6                                                                      | secondary carrier transporter     |
| <b>TCIM</b>    | TRANSCRIPTIONAL AND IMMUNE RESPONSE REGULATOR                                              |                                   |

**Supplementary Table 6.** Gene functions enriched in the black-capped chickadee DEGs

upregulated in the Boston population and downregulated in the Kent population. This table contains the TERM ID and a description of that term, a count of genes involved in those processes, and the FDR calculated by either discovery method: STRING or g:Profiler.

| Term ID            | Go Term Description                                       | Gene Count | FDR    | Detected by |
|--------------------|-----------------------------------------------------------|------------|--------|-------------|
| <b>GO:0032501</b>  | Multicellular organismal process                          | 25         | 0.0491 | g:Profiler  |
| <b>TF:M10026</b>   | Factor: PATZ; motif: GGGGNGGGGGMKGGRRNGGNRN               | 30         | 0.0054 | g:Profiler  |
| <b>TF:M12697_1</b> | Factor: ZNF142; motif: SNSCGCCCGCCCGCSCSS; match class: 1 | 10         | 0.0205 | g:Profiler  |
| <b>TF:M07436</b>   | Factor: WT1; motif: NNGGGNGGGSGN                          | 25         | 0.0446 | g:Profiler  |
| <b>CORUM:1844</b>  | APC-IQGAP1 complex                                        | 1          | 0.0498 | g:Profiler  |

**Supplementary Table 7.** Inbreeding coefficient values (F) for individuals from both species in both locations.

| Individual | Species                     | Location | Observed Homozygous | Expected Homozygous | Number Sites | F       |
|------------|-----------------------------|----------|---------------------|---------------------|--------------|---------|
| IR2_3      | <i>Spinus tristis</i>       | Boston   | 427935              | 416758.1            | 518029       | 0.11037 |
| IR2_4      | <i>Spinus tristis</i>       | Boston   | 427951              | 416758.1            | 518029       | 0.11052 |
| IR3_1      | <i>Spinus tristis</i>       | Boston   | 423575              | 416758.1            | 518029       | 0.06731 |
| IR3_2      | <i>Spinus tristis</i>       | Boston   | 428834              | 416758.1            | 518029       | 0.11924 |
| IR3_3      | <i>Spinus tristis</i>       | Boston   | 433642              | 416758.1            | 518029       | 0.16672 |
| IR3_4      | <i>Spinus tristis</i>       | Boston   | 421456              | 416758.1            | 518029       | 0.04639 |
| IR4_1      | <i>Spinus tristis</i>       | Boston   | 422147              | 416758.1            | 518029       | 0.05321 |
| IR4_2      | <i>Spinus tristis</i>       | Boston   | 430728              | 416758.1            | 518029       | 0.13795 |
| IR4_6      | <i>Spinus tristis</i>       | Kent     | 420285              | 416758.1            | 518029       | 0.03483 |
| IR4_7      | <i>Spinus tristis</i>       | Kent     | 425294              | 416758.1            | 518029       | 0.08429 |
| IR4_8      | <i>Spinus tristis</i>       | Kent     | 422230              | 416758.1            | 518029       | 0.05403 |
| IR1_1      | <i>Poecile atricapillus</i> | Boston   | 323007              | 321036.2            | 419735       | 0.01997 |
| IR1_2      | <i>Poecile atricapillus</i> | Boston   | 324304              | 321036.2            | 419735       | 0.03311 |
| IR1_3      | <i>Poecile atricapillus</i> | Boston   | 329817              | 321036.2            | 419735       | 0.08897 |
| IR2_1      | <i>Poecile atricapillus</i> | Boston   | 336465              | 321036.2            | 419735       | 0.15632 |
| IR2_2      | <i>Poecile atricapillus</i> | Boston   | 342188              | 321036.2            | 419735       | 0.21431 |

|       |                             |      |        |          |        |         |
|-------|-----------------------------|------|--------|----------|--------|---------|
| IR4_3 | <i>Poecile atricapillus</i> | Kent | 341876 | 321036.2 | 419735 | 0.21115 |
| IR4_4 | <i>Poecile atricapillus</i> | Kent | 327956 | 321036.2 | 419735 | 0.07011 |
| IR4_5 | <i>Poecile atricapillus</i> | Kent | 326634 | 321036.2 | 419735 | 0.05672 |
